# Supplementary material for: A novel approach in pediatric telegenetic services: geneticist, pediatrician and genetic counselor team
Source: PubMed Central journal article supplement — Genet Med. 2017 Apr 27;19(11):1260–7. doi: 10.1038/gim.2017.45 (PMC5682570; doi:10.1038/gim.2017.45), 2017-04-27
Supplement: gim201745x1.pdf [file gim201745x1.pdf]

**Form 4a: Parent Evaluation- appointment with Pediatrician and Genetic Counselor**

**Instructions:** Circle the answer that best indicates your agreement with each statement.

| <i>Indicate how much you agree with each of the following statements or circle if it is not applicable</i> | <b>Not applicable</b> |                   |          |       |                |
|------------------------------------------------------------------------------------------------------------|-----------------------|-------------------|----------|-------|----------------|
| 1. The information I received <u>before the visit</u> helped me understand what was going to happen.       | N/A                   | Strongly Disagree | Disagree | Agree | Strongly Agree |
| 2. Before we started, each person introduced themselves and described their role.                          | N/A                   | Strongly Disagree | Disagree | Agree | Strongly Agree |
| 3. The pediatrician and genetic counselor listened and respected the information I provided.               | N/A                   | Strongly Disagree | Disagree | Agree | Strongly Agree |
| 4. The pediatrician and genetic counselor responded to all of my questions.                                | N/A                   | Strongly Disagree | Disagree | Agree | Strongly Agree |
| 5. Privacy of information about my child and my family was protected.                                      | N/A                   | Strongly Disagree | Disagree | Agree | Strongly Agree |
| 6. I feel confident in the quality of the care provided today.                                             | N/A                   | Strongly Disagree | Disagree | Agree | Strongly Agree |
| 7. I feel confident in the recommendations from today's visit.                                             | N/A                   | Strongly Disagree | Disagree | Agree | Strongly Agree |

**Assessment of Patient Satisfaction with KU Wichita Pediatric Subspecialty Clinic-Genetic Services**

---

|                                                             |     |                   |          |       |                |
|-------------------------------------------------------------|-----|-------------------|----------|-------|----------------|
| 8. I would recommend the genetics clinic to other families. | N/A | Strongly Disagree | Disagree | Agree | Strongly Agree |
| 9. Overall, I was satisfied with the visit today.           | N/A | Strongly Disagree | Disagree | Agree | Strongly Agree |

10. Was there anything that would have made this visit better? (ie: meeting space, temperature, parking, etc.)

11. Please provide us with any additional comments.

FOR OFFICE USE ONLY

|                                                                                            |                       |                     |                    |                          |
|--------------------------------------------------------------------------------------------|-----------------------|---------------------|--------------------|--------------------------|
| Date of Visit: _____                                                                       | Type of Visit*: _____ | Linking Code: _____ | Child's Age: _____ | Genetic Condition: _____ |
| # of Prior Visits by Telemedicine: _____ Visit Type: Follow-up: FU; Diagnostic Consult: DC |                       |                     |                    |                          |
