# Supplementary material for: A novel approach in pediatric telegenetic services: geneticist, pediatrician and genetic counselor team
Source: PubMed Central journal article supplement — Genet Med. 2017 Apr 27;19(11):1260–7. doi: 10.1038/gim.2017.45 (PMC5682570; doi:10.1038/gim.2017.45), 2017-04-27
Supplement: gim201745x2.pdf [file gim201745x2.pdf]

**Form 3a: Parent Evaluation of Telegenetics appointment**

We would like to learn about your health care visit today:

- How telemedicine worked for you and your family
- The quality of the health care visit

Your answers will help us understand the needs of families who are using telemedicine and how to improve services.

---

1. Before today's visit, what made it hard to get the specialty services your child needs? *(Check all that apply)*

It costs too much to travel                       It is hard to get and/or pay for child care                       It costs too much (insurance)

I miss work and/or lose wages    Going to a large hospital is not comfortable                       Other \_\_\_\_\_

2. If you had not been able to use telemedicine to get specialty care today, what would you have done? *(Check all that apply)*

I/we would have traveled to Kansas City                       I/we would have seen our local provider

I/we would have waited until the specialist  
came near to our home in an outreach clinic                       I/we would not have gotten the care my child needed

**Form 3a: Parent Evaluation of Telegenetics appointment**

**Instructions:** Circle the answer that best indicates your agreement with each statement.

| <i>Indicate how much you agree with each of the following statements or circle if it is not applicable</i>       | <b>Not applicable</b> |                   |          |       |                |
|------------------------------------------------------------------------------------------------------------------|-----------------------|-------------------|----------|-------|----------------|
| 1. The information I received <u>before the visit</u> helped me understand what was going to happen.             | N/A                   | Strongly Disagree | Disagree | Agree | Strongly Agree |
| 2. The equipment worked well.                                                                                    | N/A                   | Strongly Disagree | Disagree | Agree | Strongly Agree |
| 3. Before we started, each person introduced themselves and described their role.                                | N/A                   | Strongly Disagree | Disagree | Agree | Strongly Agree |
| 4. The use of technology did not get in the way with being able to have a good conversation with the specialist. | N/A                   | Strongly Disagree | Disagree | Agree | Strongly Agree |
| 5. The specialist listened and respected the information I provided.                                             | N/A                   | Strongly Disagree | Disagree | Agree | Strongly Agree |
| 6. The specialist responded to all of my questions.                                                              | N/A                   | Strongly Disagree | Disagree | Agree | Strongly Agree |
| 7. Privacy of information about my child and my family was protected.                                            | N/A                   | Strongly Disagree | Disagree | Agree | Strongly Agree |
| 8. I feel confident in the quality of the care provided today.                                                   | N/A                   | Strongly Disagree | Disagree | Agree | Strongly Agree |

|                                                                                                              |     |                   |          |       |                |
|--------------------------------------------------------------------------------------------------------------|-----|-------------------|----------|-------|----------------|
| 9. I feel confident in the recommendations from today's telemedicine visit.                                  | N/A | Strongly Disagree | Disagree | Agree | Strongly Agree |
| 10. I would recommend telemedicine to other families.                                                        | N/A | Strongly Disagree | Disagree | Agree | Strongly Agree |
| 11. Overall, I was satisfied with the visit today.                                                           | N/A | Strongly Disagree | Disagree | Agree | Strongly Agree |
| 12. Despite the obstacles to receiving care in person, I would STILL prefer to travel to see the specialist. | N/A | Strongly Disagree | Disagree | Agree | Strongly Agree |

13. Has telemedicine made it any easier to get the care you need for your child? If yes, how?

14. Was there anything that would have made this visit better? (ie: meeting space, temperature, parking, etc.)

15. Please provide us with any additional comments.

FOR OFFICE USE ONLY

|                                                                                             |                       |                     |                    |                          |
|---------------------------------------------------------------------------------------------|-----------------------|---------------------|--------------------|--------------------------|
| Date of Visit: _____                                                                        | Type of Visit*: _____ | Linking Code: _____ | Child's Age: _____ | Genetic Condition: _____ |
| # of Prior Visits by Telemedicine: _____ *Visit Type: Follow-up: FU; Diagnostic Consult: DC |                       |                     |                    |                          |
